# Supplementary material for: Differences in biomass and silica content in typical plant communities with ecotones in the Min River estuary of southeast China
Source: PeerJ. 2019 Jul 22;7:e7218. doi: 10.7717/peerj.7218 (PMC6657677; doi:10.7717/peerj.7218)
Supplement: Supplemental Information 1 — Biogenic Si content, biomass, density and height, available Si content, and soil properties. [file peerj-07-7218-s001.xlsx]

## Sheet: BSi content
	Locations	Species	Transect A	Biogenic silica-mg/g					Transect B	Biogenic silica-mg/g
				Culm	Litter	Leaf	Root			Culm	Litter	Leaf	Root
	Typical community	Cyperus malaccensis	A1-repeat 1	17.0382	14.8758	21.9652	3.78114		B1-repeat 1	9.89521	11.7408	14.4901	9.12793
		Cyperus malaccensis	A1-repeat 2	16.1063	20.51	23.995	4.03974		B1-repeat 2	14.0794	7.05298	11.0596	8.62993
		Cyperus malaccensis	A1-repeat 3	16.5839		22.6767	2.89508		B1-repeat 3	11.3439	11.5853	10.1949	7.08221
	Ecotonal community	Cyperus malaccensis	A2-repeat 1	17.2741	13.9984	7.65441	4.56104		B2-repeat 1	10.4992	11.8375	13.4265	9.41156
		Cyperus malaccensis	A2-repeat 2	14.5185		7.21321	2.81414		B2-repeat 2	10.9109	11.7271	14.9885
		Cyperus malaccensis	A2-repeat 3				2.06954		B2-repeat 3	5.44322
		Phragmites australis	A2-repeat 1	28.1344	47.54	25.2752	9.81773		B2-repeat 1	26.6737	27.7199	11.5631	17.09
		Phragmites australis	A2-repeat 2	21.6356	13.1977	22.839			B2-repeat 2	17.2483	18.5182	7.63614	12.7673
		Phragmites australis	A2-repeat 3	25.6728	37.4595	21.3345			B2-repeat 3	10.3088	15.5008	9.88487	12.1485
	Typical community	Phragmites australis	A3-repeat 1	13.8526	22.7862	20.0245	7.51803		B3-repeat 1	20.7575	12.5448	13.1138	12.1964
		Phragmites australis	A3-repeat 2	18.0806	16.4812	17.8092	9.93917		B3-repeat 2	15.4213	21.884	8.05321	11.8822
		Phragmites australis	A3-repeat 3	25.4882	18.7333	19.2411	7.94816		B3-repeat 3	13.5335	18.1607	12.8787	10.3609
	Ecotonal community	Phragmites australis	A4-repeat 1	14.3189	20.375	15.9251	6.44472		B4-repeat 1	10.2132	8.20917	10.0244	6.91779
		Phragmites australis	A4-repeat 2	12.1172	10.6595	19.6931	7.84223		B4-repeat 2	12.3278	15.8127	10.1809	5.93729
		Phragmites australis	A4-repeat 3	13.2508	26.7671	22.5912			B4-repeat 3	14.0969	13.4452	8.21044
		Cyperus malaccensis	A4-repeat 1	9.50325	9.06766	6.59417	4.70462		B4-repeat 1	5.37623	6.25	6.56414	5.38704
		Cyperus malaccensis	A4-repeat 2	10.7616	8.59291	7.91054	2.71927		B4-repeat 2	4.29627	4.11545	5.70183	4.39358
		Cyperus malaccensis	A4-repeat 3						B4-repeat 3	4.93607	4.84704	6.78746	8.485
	Typical community	Cyperus malaccensis	A5-repeat 1	9.04754	11.646	11.8091	1.27508		B5-repeat 1	6.68478	4.64401	7.76792	5.5473
		Cyperus malaccensis	A5-repeat 2	8.97324	10.6193	10.7362	1.49503		B5-repeat 2	5.74836	5.68301	7.02365	7.2977
		Cyperus malaccensis	A5-repeat 3	10.9472	9.99167	10.8832	2.16638		B5-repeat 3	6.21266	6.91054	10.0201	4.7425

## Sheet: Biomass
	Locations	Species	Transect A	Biomass-g/m2						Transect B	Biomass-g/m2
				Culm	Litter	Leaf	Root	Total			Culm	Litter	Leaf	Root	Total
	Typical community	Cyperus malaccensis	A1-repeat 1	805.56	37.28	7.96	772.293	1623.09		B1-repeat 1	1213.88	71.4	9.4	593.312	1887.99
		Cyperus malaccensis	A1-repeat 2	658.4	35.6	5.24	686.624	1385.86		B1-repeat 2	919	66.04	8.04	962.42	1955.5
		Cyperus malaccensis	A1-repeat 3	790.36	31.76	2.8	961.783	1786.7		B1-repeat 3	1168.92	66.36	7.48	998.089	2240.85
	Ecotonal community	Cyperus malaccensis	A2-repeat 1	343.16	18.28	1.44	656.906	1019.79		B2-repeat 1	270.56	12.24	2.4	621.26	906.46
		Cyperus malaccensis	A2-repeat 2	664.64	16.92	2.56	744.749	1428.87		B2-repeat 2	136	34.4	4.96	590.707	766.067
		Cyperus malaccensis	A2-repeat 3							B2-repeat 3	233.96	10.6	2.64	514.959	762.159
		Phragmites australis	A2-repeat 1	93.56	146.04	80.88	675.97	996.45		B2-repeat 1	496.96	41.88	116.6	606.74	1262.18
		Phragmites australis	A2-repeat 2	461.84	135.92	72.96	722.69	1393.41		B2-repeat 2	277.08	90	182.76	498.92	1048.76
		Phragmites australis	A2-repeat 3							B2-repeat 3
	Typical community	Phragmites australis	A3-repeat 1	851.04	208.32	357.32	966.242	2382.92		B3-repeat 1	636.64	224.64	376.4	1693.31	2930.99
		Phragmites australis	A3-repeat 2	581	53.16	211.64	484.395	1330.19		B3-repeat 2	553.16	548.52	410.56	745.541	2257.78
		Phragmites australis	A3-repeat 3	714.8	122.28	390.24	1142.68	2370		B3-repeat 3	754.32	154.28	512.88	1176.43	2597.91
	Ecotonal community	Phragmites australis	A4-repeat 1	233.16	105.88	109.6	600.891	1049.53		B4-repeat 1	432.32	113.32	277.12	659.402	1482.16
		Phragmites australis	A4-repeat 2	507.48	35.76	75.16	683.323	1301.72		B4-repeat 2	304.28	39.64	175.2	722.877	1242
		Phragmites australis	A4-repeat 3	163.08	145.68	67.28	638.765	1014.81		B4-repeat 3	523.44	131.64	190.6	901.165	1746.85
		Cyperus malaccensis	A4-repeat 1	248.8	11.72	2.44	586.72	849.68		B4-repeat 1	342.04	16.68	2.92	639.402	1001.04
		Cyperus malaccensis	A4-repeat 2							B4-repeat 2	379.24	16.44	2.72	940.165	1338.57
		Cyperus malaccensis	A4-repeat 3							B4-repeat 3	255.04	20.72	2.6	713.88	992.24
	Typical community	Cyperus malaccensis	A5-repeat 1	922.96	41.24	4.28	762.739	1731.22		B5-repeat 1	1045	31.4	7.44	402.866	1486.71
		Cyperus malaccensis	A5-repeat 2	1327.44	69.44	25.24	1055.41	2477.53		B5-repeat 2	1288.08	121.6	6.48	676.433	2092.59
		Cyperus malaccensis	A5-repeat 3	1255.32	67.52	9.32	1039.17	2371.33		B5-repeat 3	891.84	51.28	6.8	647.771	1597.69

## Sheet: Density and height
	Locations	Species	Transect A	Density-plants/m2	Height-cm		Transect B	Density-plants/m2	Height-cm
	Typical community	Cyperus malaccensis	A1-repeat 1	1088	117.3		B1-repeat 1	1092	124.62
		Cyperus malaccensis	A1-repeat 2	1368	99.4		B1-repeat 2	800	119.66
		Cyperus malaccensis	A1-repeat 3	844	120.1		B1-repeat 3	1448	101.727
	Ecotonal community	Cyperus malaccensis	A2-repeat 1	324	103.987		B2-repeat 1	728	79.7
		Cyperus malaccensis	A2-repeat 2	448	108.68		B2-repeat 2	860	95.64
		Cyperus malaccensis	A2-repeat 3	684	102.84		B2-repeat 3	508	83.7867
		Phragmites australis	A2-repeat 1	100	91.43		B2-repeat 1
		Phragmites australis	A2-repeat 2	84	113.38		B2-repeat 2	116	102.4
		Phragmites australis	A2-repeat 3	100	124.425		B2-repeat 3	220	96.96
	Typical community	Phragmites australis	A3-repeat 1	76	197.62		B3-repeat 1	72	171.9
		Phragmites australis	A3-repeat 2	72	177.82		B3-repeat 2	104	153.8
		Phragmites australis	A3-repeat 3	56	227.08		B3-repeat 3	100	162.4
	Ecotonal community	Phragmites australis	A4-repeat 1	148	141.713		B4-repeat 1	108	146.89
		Phragmites australis	A4-repeat 2	120	131.683		B4-repeat 2	80	130.54
		Phragmites australis	A4-repeat 3				B4-repeat 3	184	145.5
		Cyperus malaccensis	A4-repeat 1	344	125.22		B4-repeat 1	388	125.523
		Cyperus malaccensis	A4-repeat 2	164	116.38		B4-repeat 2	284	134.513
		Cyperus malaccensis	A4-repeat 3	116	122.22		B4-repeat 3	204	130.55
	Typical community	Cyperus malaccensis	A5-repeat 1	1108	107.64		B5-repeat 1	1356	109.007
		Cyperus malaccensis	A5-repeat 2	1724	103.387		B5-repeat 2	1624	118.853
		Cyperus malaccensis	A5-repeat 3	1584	107.187		B5-repeat 3	1400	100.58

## Sheet: Avaliable Si content
	Locations	Transect A	Depth-cm	Available silica-mg/kg				Transect B	Depth-cm	Available silica-mg/kg
				Repeat 1	Repeat 2	Repeat 3				Repeat 1	Repeat 2	Repeat 3
	Typical	A1-1	0-10	467.663	489.435	355.67		B1-1	0-10	454.361	431.779	387.828
		A1-2	10-20	374.182	536.102	329.733		B1-2	10-20	462.219	439.259	363.871
		A1-3	20-30	416.157	440.283	426.567		B1-3	20-30	531.464	504.159	407.644
		A1-4	30-40	428.806	341.404	429.747		B1-4	30-40	513.728	453.964	294.087
	Ecotonal	A2-1	0-10	524.589	557.196	323.783		B2-1	0-10	600.843	579.035	544.25
		A2-2	10-20	538.448	466.902	341.261		B2-2	10-20	595.471	585.139	437.206
		A2-3	20-30	531.528	461.551	489.813		B2-3	20-30	453.909	508.468	412.92
		A2-4	30-40	435.815	425.072	414.424		B2-4	30-40	423.339	345.94	445.767
	Typical	A3-1	0-10	602.117	541.763	586.647		B3-1	0-10	591.396	474.166	503.248
		A3-2	10-20	495.783	493.502	463.081		B3-2	10-20	598.879	563.481	569.326
		A3-3	20-30	404.383	404.383	404.383		B3-3	20-30	567.318	510.595	463.035
		A3-4	30-40	330.585	344.268	344.268		B3-4	30-40	403.793	353.227	358.882
	Ecotonal	A4-1	0-10	714.627	686.797	694.901		B4-1	0-10	708.247	628.347	682.043
		A4-2	10-20	591.313	599.675	598.915		B4-2	10-20	685.03	636.731	423.424
		A4-3	20-30	649.551	653.355	653.355		B4-3	20-30	507.748	483.199	512.504
		A4-4	30-40	499.386	504.708	503.947		B4-4	30-40	437.048	352.812	393.81
	Typical	A5-1	0-10	408.03	434.216	657.498		B5-1	0-10	492.969	575.811	619.773
		A5-2	10-20	428.815	435.659	435.659		B5-2	10-20	527.82	674.29	489.181
		A5-3	20-30	425.832	419.748	420.509		B5-3	20-30	638.128	624.274	572.852
		A5-4	30-40	379.431	386.276	387.037		B5-4	30-40	466.855	549.791	517.373

## Sheet: Soil properties
	Locations	Transect A	Depth-cm	Moisture-%	BD-g/cm3	EC-ms/cm	pH	Particle size-%			Soil organic matter-%		Total carbon-mg/kg			Total nitrogen-mg/kg
								<2 μm	2-20 μm	>20 μm	Repeat 1	Repeat 2	Repeat 1	Repeat 2	Repeat 3	Repeat 1	Repeat 2	Repeat 3
	Typical	A1-1	0-10	0.46622	0.920735	2.27	6.42	12.511	59.085	28.404	6.693	6.141	48.6343	31.4477	51.287	3.81147	2.50417	4.33736
		A1-2	10-20	0.378005	1.16037	3.88	6.08	15.08	70.866	14.055	5.75	4.83	39.437	31.2007	31.9967	3.04637	2.33673	2.58193
		A1-3	20-30	0.393068	1.12198	4.28	6.11	13.737	68.271	17.992	3.887	5.957	22.6391	24.2633	20.1554	1.52415	1.76185	1.35125
		A1-4	30-40	0.39251	1.14541	4.33	6.97	16.407	71.787	11.806	3.979	5.842	17.9472	23.0822	20.0704	1.31637	1.35134	1.34688
	Ecotonal	A2-1	0-10	0.544912	0.794867	2.57	6.59	12.939	60.402	26.66	6.463	5.543	42.2356	41.3523	33.4352	3.16163	3.41137	2.76166
		A2-2	10-20	0.533701	0.830018	3.93	6.64	16.492	71.561	11.947	4.784	3.404	32.9345	25.1091	25.0747	2.65787	1.97671	1.90883
		A2-3	20-30	0.396591	1.12488	4.7	6.66	16.612	70.849	12.539	4.945	5.911	21.2545	18.6661	18.0171	1.53739	1.23811	1.27601
		A2-4	30-40	0.411834	1.09432	4.66	6.64	15.662	66.92	17.419	6.187	4.209	18.0412	19.108	17.2989	1.18153	1.25372	1.2606
	Typical	A3-1	0-10	0.571825	0.816249	2.33	5.94	15.488	56.43	28.082	6.187	7.429	33.6985	35.6174	38.2349	2.81072	2.99041	3.01128
		A3-2	10-20	0.557259	0.860486	4.64	5.92	14.692	74.425	10.884	4.117	4.876	28.4008	37.3128	30.8972	2.36905	2.96061	2.6315
		A3-3	20-30	0.493802	0.949255	5.25	5.92	17.627	73.32	9.053	3.979	5.106	21.7998	27.213	21.9333	1.72093	2.10554	1.67787
		A3-4	30-40	0.444244	1.05176	4.28	5.91	14.495	69.68	15.825	3.933	5.428	18.6919	18.48	17.1573	1.39391	1.37667	1.2956
	Ecotonal	A4-1	0-10	0.537624	0.857166	3.08	6.08	13.515	61.951	24.534	7.268	6.808	27.1855	26.4639	19.8161	2.21444	2.15164	1.591
		A4-2	10-20	0.511666	0.913562	3.79	6.06	9.347	63.132	27.521	6.716	6.739	21.9711	24.0411	19.231	1.84065	1.97565	1.53465
		A4-3	20-30	0.499963	0.922023	3.74	5.96	8.36	49.281	42.359	6.371	5.911	21.5536	21.8101	27.1254	1.77893	1.73274	2.19779
		A4-4	30-40	0.477313	0.971358	4.78	6	14.548	73.716	11.736	4.14	6.302	22.2372	22.6405	20.2545	1.80241	1.73997	1.86778
	Typical	A5-1	0-10	0.484882	0.983916	1.94	6.12	14.256	64.018	21.727	6.762	4.439	26.5385	25.6059	19.0354	2.26942	2.06431	1.67093
		A5-2	10-20	0.438716	0.983516	2.05	6.14	10.65	65.963	23.387	5.704	3.818	20.6619	23.7239	18.9992	1.69909	1.80761	1.54029
		A5-3	20-30	0.457849	1.03646	3.37	6.07	12.627	63.022	24.351	4.255	4.255	20.1229	22.9621	18.0242	1.56917	1.79563	1.49877
		A5-4	30-40	0.481046	0.98579	4.47	6.12	16.985	68.972	14.043	3.818	3.036	18.1801	20.4423	18.1861	1.47112	1.62703	1.46719
	Locations	Transect B	Depth-cm	Moisture-%	BD-g/cm3	EC-ms/cm	pH	Particle size-%			Soil organic matter-%		Total carbon-mg/kg			Total nitrogen-mg/kg
								<2 μm	2-20 μm	>20 μm	Repeat 1	Repeat 2	Repeat 1	Repeat 2	Repeat 3	Repeat 1	Repeat 2	Repeat 3
	Typical	B1-1	0-10	0.463839	1.00421	2.99	6.49	19.244	56.313	24.444	4.531	4.347	44.1748	44.8192	39.8581	3.63867	3.90654	3.31913
		B1-2	10-20	0.373813	1.12752	2.87	6.38	11.525	65.529	22.946	3.933	4.462	28.4363	32.7034	35.3472	2.60376	2.91316	2.98302
		B1-3	20-30	0.352573	1.21029	2.1	6.49	15.034	65.26	19.706	2.346	2.392	13.6937	13.7345	18.5795	1.0773	1.02867	1.43707
		B1-4	30-40	0.361979	1.27315	2.95	6.49	15.238	68.261	16.501	2.5438	2.438	14.325	15.1271	15.7001	1.04714	0.995652	1.1695
	Ecotonal	B2-1	0-10	0.410135	1.08075	2.72	5.84	18.283	69.578	12.14	5.405	5.428	23.3982	22.2576	23.5081	2.2123	1.97035	2.11166
		B2-2	10-20	0.405808	1.10826	4.25	5.95	16.861	71.754	11.385	5.313	5.773	21.438	17.472	18.1596	1.84274	1.51509	1.67028
		B2-3	20-30	0.401137	1.15834	3.14	6.07	12.054	57.644	30.302	4.462	2.415	17.5715	14.5683	14.899	1.54071	1.12119	1.06825
		B2-4	30-40	0.274426	1.27273	4.18	5.86	13.848	60.973	25.179	5.451	2.484	13.8986	16.9564	14.3	0.978821	1.01015	1.00394
	Typical	B3-1	0-10	0.54826	0.89972	2.36	6.45	16.636	54.454	28.91	4.232	4.6	30.5281	39.9429	37.4278	2.62531	3.28164	3.05246
		B3-2	10-20	0.486437	0.974814	3.6	6.43	11.571	59.759	28.67	2.898	4.715	28.8171	24.9085	25.2338	2.44484	2.1387	2.11089
		B3-3	20-30	0.486308	1.00518	1.66	6.37	17.742	59.019	23.239	2.99	5.083	28.497	17.2143	16.57	2.25078	1.49402	1.41322
		B3-4	30-40	0.489868	0.998746	4.3	6.43	15.102	73.931	10.968	2.484	4.232	20.2403	19.1185	17.1677	1.73977	1.48189	1.33474
	Ecotonal	B4-1	0-10	0.580622	0.801583	1.69	5.75	17.814	66.608	15.577	4.876	4.508	20.0517	22.3176	18.7704	1.86371	1.75237	1.61048
		B4-2	10-20	0.522522	0.893912	2.69	5.75	15.984	67.216	16.8	4.761	4.347	23.6984	18.8513	24.0211	2.01499	1.53267	2.01201
		B4-3	20-30	0.547602	0.845824	3.3	6.15	12.303	64.557	23.141	4.554	3.473	27.0423	18.4025	18.8302	2.12738	1.56402	1.58195
		B4-4	30-40	0.513756	0.94401	3.24	5.89	13.409	64.263	22.328	3.887	2.691	22.9215	21.1659	20.5322	1.8056	1.67265	1.70547
	Typical	B5-1	0-10	0.486709	0.963874	1.6	5.98	5.919	39.624	54.458	3.404	4.462	17.7442	14.7554	16.5896	1.45096	1.19729	1.4763
		B5-2	10-20	0.479018	1.03177	2.44	5.91	9.209	57.951	32.84	2.783	2.622	18.999	15.9089	16.2554	1.53842	1.32215	1.35954
		B5-3	20-30	0.45009	1.05097	2.85	6.94	13.427	67.3	19.273	3.45	2.737	16.5713	16.1577	17.7402	1.27954	1.33393	1.28456
		B5-4	30-40	0.48128	0.997785	3.4	6.04	17.02	66.589	16.391	2.484	2.231	16.9503	15.3918	17.6042	1.35542	1.12231	1.34374
